# Supplementary material
Source: PubMed Central journal article supplement (PMC9122739)
Supplement: mmc1.pdf [file mmc1.pdf]

# **Online Appendix for Public Trust, Policing, and the COVID-19 Pandemic: Evidence from an Electoral Authoritarian Regime**

Supporting Information not meant for print publication.

## **APPENDIX**

|          |                                   |          |
|----------|-----------------------------------|----------|
| <b>A</b> | <b>Descriptive statistics</b>     | <b>2</b> |
| <b>B</b> | <b>Districts in Study Sample</b>  | <b>4</b> |
| <b>C</b> | <b>Ethics and Survey Protocol</b> | <b>6</b> |
| <b>D</b> | <b>Additional analyses</b>        | <b>7</b> |

## A DESCRIPTIVE STATISTICS

Table A.1: Summary Statistics

|                                          | Obs  | Mean  | SD    | Min  | Max  |
|------------------------------------------|------|-------|-------|------|------|
| Summary Compliance Index                 | 2586 | 0.16  | 1.01  | -8.2 | 2.0  |
| Stayed Home (Last 7 Days)                | 2587 | 2.63  | 2.42  | 0.0  | 7.0  |
| N. Times Religious Service (Last 7 Days) | 2587 | 0.10  | 0.60  | 0.0  | 7.0  |
| N. Times Restaurant/Cafe (Last 7 Days)   | 2587 | 0.50  | 1.40  | 0.0  | 7.0  |
| N. Times Comm. Meeting (Last 7 Days)     | 2587 | 0.19  | 0.58  | 0.0  | 7.0  |
| N. Times Social Gathering (Last 7 Days)  | 2587 | 0.39  | 0.76  | 0.0  | 7.0  |
| Kept Social Distance                     | 2587 | 2.71  | 1.08  | 1.0  | 4.0  |
| Worn Face Mask                           | 2586 | 3.08  | 1.05  | 1.0  | 4.0  |
| Agreement with lockdown                  | 2587 | 4.22  | 1.24  | 1.0  | 5.0  |
| Agreement with ban on gatherings         | 2586 | 4.31  | 1.22  | 1.0  | 5.0  |
| Agreement with social distancing         | 2585 | 4.69  | 0.71  | 1.0  | 5.0  |
| Trust Central Gov (Baseline)             | 2214 | 2.85  | 1.04  | 1.0  | 4.0  |
| Trust Police (Baseline)                  | 2235 | 3.30  | 1.38  | 1.0  | 5.0  |
| Trust District Gov (Baseline)            | 2118 | 2.49  | 1.07  | 1.0  | 4.0  |
| Trust in LC3 Gov (Baseline)              | 2170 | 2.77  | 1.04  | 1.0  | 4.0  |
| Trust LC1 Gov (Baseline)                 | 2140 | 3.27  | 0.97  | 1.0  | 4.0  |
| Trust People in Community (Baseline)     | 2244 | 2.70  | 0.91  | 1.0  | 4.0  |
| Trust Central Gov (Follow-up)            | 2569 | 3.19  | 0.93  | 1.0  | 4.0  |
| Trust MoH (Follow-up)                    | 2585 | 3.58  | 0.68  | 1.0  | 4.0  |
| Trust Police (Follow-up)                 | 2583 | 2.88  | 1.04  | 1.0  | 4.0  |
| Trust District Gov (Follow-up)           | 2552 | 2.39  | 1.08  | 1.0  | 4.0  |
| Trust LC1 Gov (Follow-up)                | 2585 | 3.25  | 0.88  | 1.0  | 4.0  |
| Trust People in Community (Follow-up)    | 2584 | 2.85  | 0.92  | 1.0  | 4.0  |
| NRM Party ID                             | 2617 | 0.65  | 0.48  | 0.0  | 1.0  |
| N. Correct Symptoms Named                | 2587 | 2.89  | 0.40  | 0.0  | 3.0  |
| N. COVID Facts Correct                   | 2587 | 2.33  | 0.75  | 0.0  | 3.0  |
| Female                                   | 2617 | 0.48  | 0.50  | 0.0  | 1.0  |
| Age                                      | 2617 | 43.33 | 14.29 | 18.0 | 95.0 |
| Education                                | 2617 | 1.62  | 1.38  | 0.0  | 7.0  |
| Religiosity                              | 2587 | 3.15  | 0.82  | 1.0  | 5.0  |

Table A.2: Attrition from Baseline Sample

| Variable            | (1)<br>COVID Sample | (2)<br>Baseline Attrition | (3)<br>Difference    |
|---------------------|---------------------|---------------------------|----------------------|
| Age                 | 41.757<br>(14.175)  | 41.493<br>(17.660)        | -0.264<br>(0.552)    |
| Married             | 0.801<br>(0.399)    | 0.696<br>(0.460)          | -0.105**<br>(0.015)  |
| Have Children       | 0.931<br>(0.253)    | 0.861<br>(0.346)          | -0.070**<br>(0.010)  |
| Literacy            | 0.784<br>(0.412)    | 0.586<br>(0.493)          | -0.197**<br>(0.016)  |
| Level of Education  | 1.612<br>(1.371)    | 1.179<br>(1.092)          | -0.432**<br>(0.046)  |
| Employed            | 0.880<br>(0.325)    | 0.822<br>(0.382)          | -0.057**<br>(0.012)  |
| HH Income           | 167250<br>(408713)  | 93,824<br>(240116)        | -73426**<br>(12,830) |
| Trust LC1           | 2.266<br>(0.974)    | 2.271<br>(0.991)          | 0.004<br>(0.035)     |
| Trust LC3 Govt      | 1.766<br>(1.042)    | 1.799<br>(1.079)          | 0.033<br>(0.038)     |
| Trust District Govt | 1.491<br>(1.067)    | 1.574<br>(1.072)          | 0.083*<br>(0.039)    |
| Trust Central Govt  | 1.845<br>(1.040)    | 1.958<br>(1.042)          | 0.113**<br>(0.037)   |
| Trust Police        | 3.296<br>(1.383)    | 3.535<br>(1.365)          | 0.239**<br>(0.049)   |
| Observations        | 2,245               | 1,211                     |                      |

Table A.3: Comparison with Uganda Afrobarometer R8

| Variable            | (1)<br>Afrobarometer R8 | (2)<br>Covid Sample | (3)<br>Difference   |
|---------------------|-------------------------|---------------------|---------------------|
| Age                 | 36.916<br>(14.991)      | 40.842<br>(13.612)  | 3.926**<br>(0.568)  |
| No Formal Education | 0.111<br>(0.314)        | 0.079<br>(0.269)    | -0.032**<br>(0.011) |
| Close to a Party    | 0.767<br>(0.423)        | 0.757<br>(0.429)    | -0.010<br>(0.018)   |
| NRM ID              | 0.510<br>(0.500)        | 0.650<br>(0.477)    | 0.140**<br>(0.020)  |
| Observations        | 904                     | 1,905               |                     |

Note: Afrobarometer sample is from rural enumeration areas in Uganda's round 8 survey.

"Covid" sample is our mobile phone survey sample used for main analysis.

## B DISTRICTS IN STUDY SAMPLE

Table B.1: Sample District Comparison - Census Data

| Variable            | (1)<br>Out of Sample Districts | (2)<br>Covid Sample Districts | (3)<br>Difference    |
|---------------------|--------------------------------|-------------------------------|----------------------|
| District Population | 261152<br>(226052)             | 453163<br>(90,500)            | 192011**<br>(63,557) |
| Age                 | 19.937<br>(1.038)              | 20.554<br>(0.782)             | 0.616*<br>(0.299)    |
| Literacy            | 0.437<br>(0.102)               | 0.494<br>(0.045)              | 0.057<br>(0.029)     |
| Years of Education  | 3.850<br>(1.011)               | 4.494<br>(0.537)              | 0.645*<br>(0.286)    |
| Own Vehicle         | 0.033<br>(0.034)               | 0.042<br>(0.017)              | 0.009<br>(0.010)     |
| Own Motorcycle      | 0.089<br>(0.043)               | 0.100<br>(0.030)              | 0.011<br>(0.012)     |
| Own Television      | 0.070<br>(0.097)               | 0.111<br>(0.058)              | 0.042<br>(0.028)     |
| Own Radio           | 0.593<br>(0.156)               | 0.655<br>(0.087)              | 0.063<br>(0.044)     |
| Sugar consumption   | 0.643<br>(0.177)               | 0.727<br>(0.145)              | 0.084<br>(0.051)     |
| Distance to Water   | 0.967<br>(0.328)               | 0.874<br>(0.274)              | -0.093<br>(0.095)    |
| Rooms in Home       | 1.899<br>(0.211)               | 1.946<br>(0.125)              | 0.047<br>(0.060)     |
| Observations        | 99                             | 13                            | 112                  |

Note: Table shows average characteristics of districts based on 2014 census data.

Figure B.1: Location of Districts in Sample

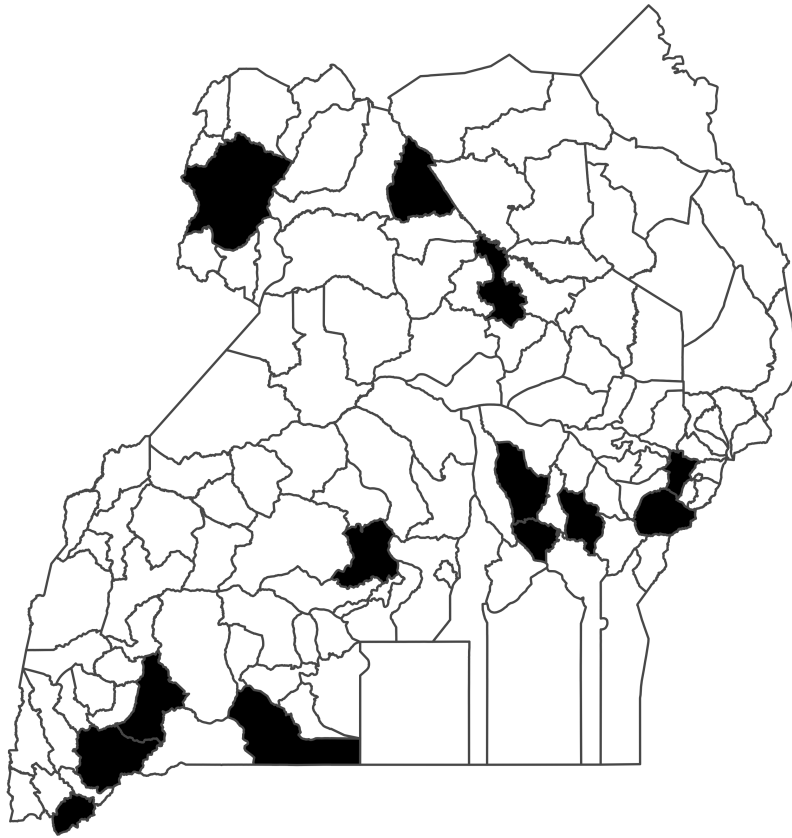

## C ETHICS AND SURVEY PROTOCOL

Studying public health compliance in the initial wave of the COVID-19 pandemic has important ethical implications. Our main aim throughout was to learn from and contribute to prior research on this topic while ensuring that minimal risk was posed to survey respondents. A primary ethical concern was making sure that our efforts would not contribute to the transmission of the virus. A secondary concern was reducing anxiety around discussing difficult or socially sensitive issues. We took several steps to address these concerns before implementing our study.

Most important, our study relied on a mobile phone survey rather than face-to-face interviews, which reduced the risk of transmitting the virus. The mobile phone survey built on a

previous in-person survey that was conducted as part of a community policing study. In-person survey respondents indicated whether they were willing to be contacted again in future research. This provided a unique opportunity for us to follow up with an existing sample of respondents with whom our implementing partner IPA had already established a relationship, this time focusing on both policing and public health.

To reduce anxiety around socially sensitive issues, we repeatedly reassured respondents that they could skip individual questions or entire modules if they experienced any discomfort during the survey. We also worked closely with both university IRBs and Ugandan review boards to ensure that best ethical practices were used throughout. Our study was approved by one of the author's university IRB, MILDMAY Uganda Research and Ethics Committee (MUREC), and the Ugandan National Council for Science and Technology (UNCST) (ID numbers redacted for anonymity during peer review). Our study was preregistered in the American Economic Association's registry for randomized controlled trials (ID number redacted for anonymity during peer review).

In our study, we discuss our sample. We provide a few additional comments here. On the one hand, admittedly, our sample cannot be considered nationally representative. We show how our sample varies from rural enumeration areas in Round 8 of the Afrobarometer. On average the respondents in our sample are somewhat older, less educated, and more likely to be NRM supporters than those in the Afrobarometer (see Table A.3). On the other hand, with the imperative of using mobile phones to reach respondents during the pandemic, no survey could have recovered a nationally representative sample given the relatively low rates of mobile phone ownership in rural Uganda (and rural Africa more broadly). A key advantage of our study's sample over much of the existing work is that our measures of respondents' trust have been recorded more than a year prior to the onset of the pandemic.

## D ADDITIONAL ANALYSES

Table D.1: Endorsement Experiment

|                           | (1)<br>Support for<br>Ban on Gatherings | (2)<br>Support for Social<br>Distancing Rules | (3)<br>Index of Support       |
|---------------------------|-----------------------------------------|-----------------------------------------------|-------------------------------|
| Base category: Government |                                         |                                               |                               |
| International NGOs        | -0.09 <sup>+</sup><br>(0.05)            | -0.06<br>(0.06)                               | -0.09 <sup>+</sup><br>(0.06)  |
| Religious leaders         | -0.15 <sup>**</sup><br>(0.05)           | -0.07<br>(0.05)                               | -0.14 <sup>**</sup><br>(0.05) |
| Traditional leaders       | -0.10 <sup>*</sup><br>(0.05)            | -0.04<br>(0.05)                               | -0.09 <sup>+</sup><br>(0.05)  |
| Constant                  | 0.09 <sup>*</sup><br>(0.04)             | 0.04<br>(0.04)                                | 0.08 <sup>*</sup><br>(0.04)   |
| Observations              | 2584                                    | 2584                                          | 2584                          |

Notes: OLS regression models with standard errors clustered at the village level.

DVs: (1) Agreement with ban on gatherings; (2) Agreement with social distancing rules; (3) Index of agreement with ban and social distancing rules.

<sup>+</sup>  $p < 0.10$ , <sup>\*</sup>  $p < 0.05$ , <sup>\*\*</sup>  $p < 0.01$ , <sup>\*\*\*</sup>  $p < 0.001$



Figure D.1: Support for Banning Gatherings (Pairwise Comparisons)

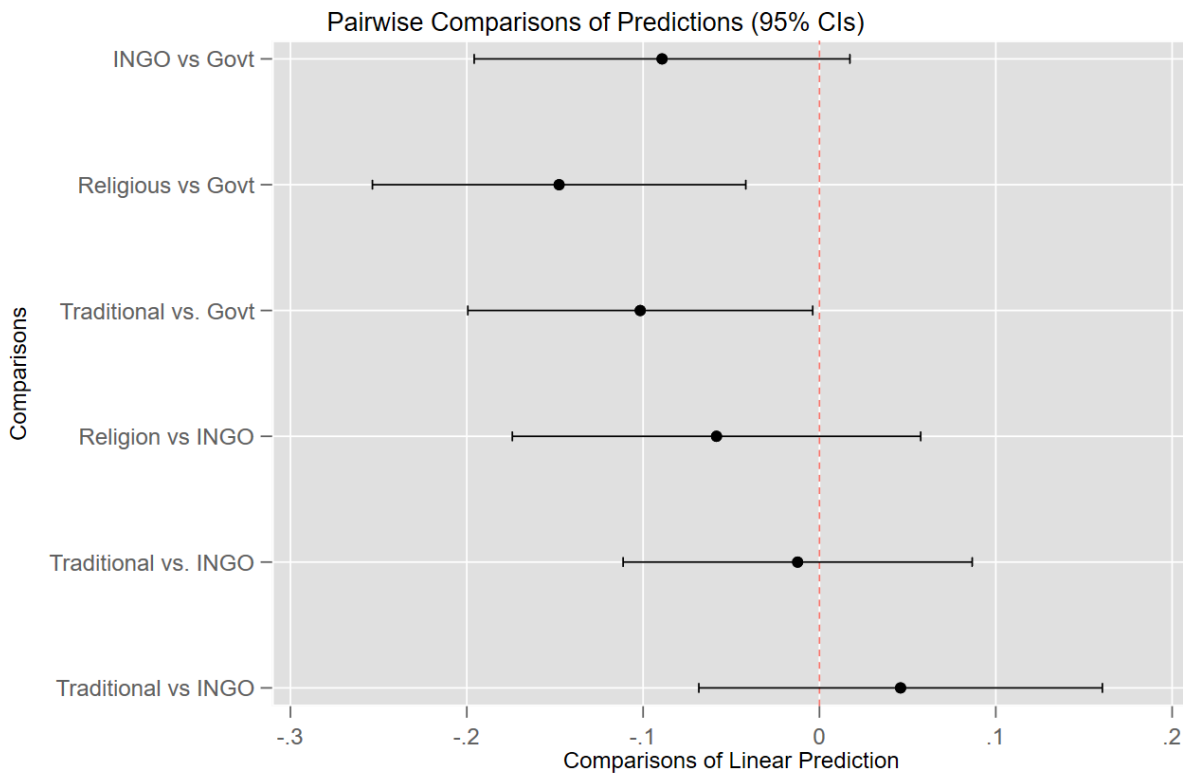

Notes: Pairwise comparisons of linear predictions from Model 1 in Table D.1 with 95% confidence intervals. Standard errors are clustered at the village level.

Table D.2: Endorsement Experiment - Balance Tests

| Variable            | (1)<br>Government |                   | (2)<br>Intl NGOs |                   | (3)<br>Religious |                   | (4)<br>Traditional |                   | F-test<br>for joint<br>orthogonality<br>(p-value) |
|---------------------|-------------------|-------------------|------------------|-------------------|------------------|-------------------|--------------------|-------------------|---------------------------------------------------|
|                     | N                 | Mean/SE           | N                | Mean/SE           | N                | Mean/SE           | N                  | Mean/SE           |                                                   |
| Female              | 670               | 0.455<br>(0.019)  | 638              | 0.505<br>(0.020)  | 654              | 0.489<br>(0.020)  | 625                | 0.462<br>(0.020)  | 0.245                                             |
| Age                 | 670               | 42.909<br>(0.540) | 638              | 43.265<br>(0.554) | 654              | 43.315<br>(0.543) | 625                | 43.198<br>(0.593) | 0.955                                             |
| Education           | 670               | 1.590<br>(0.050)  | 638              | 1.672<br>(0.057)  | 654              | 1.613<br>(0.054)  | 625                | 1.643<br>(0.057)  | 0.723                                             |
| Religiosity         | 670               | 3.142<br>(0.032)  | 638              | 3.161<br>(0.034)  | 654              | 3.165<br>(0.034)  | 625                | 3.112<br>(0.029)  | 0.645                                             |
| NRM Party ID        | 670               | 0.666<br>(0.018)  | 638              | 0.674<br>(0.019)  | 654              | 0.665<br>(0.018)  | 625                | 0.634<br>(0.019)  | 0.446                                             |
| Income (Standard)   | 568               | 0.018<br>(0.048)  | 540              | -0.013<br>(0.033) | 555              | -0.063<br>(0.023) | 549                | -0.003<br>(0.034) | 0.429                                             |
| Trust Central Govt  | 563               | 1.824<br>(0.044)  | 535              | 1.910<br>(0.044)  | 547              | 1.788<br>(0.046)  | 543                | 1.875<br>(0.044)  | 0.221                                             |
| Trust Police        | 564               | 3.280<br>(0.058)  | 539              | 3.410<br>(0.058)  | 554              | 3.235<br>(0.059)  | 550                | 3.271<br>(0.060)  | 0.171                                             |
| Trust District Govt | 546               | 1.557<br>(0.045)  | 509              | 1.438<br>(0.048)  | 522              | 1.446<br>(0.046)  | 514                | 1.527<br>(0.047)  | 0.185                                             |
| Trust in LC3 Govt   | 556               | 1.768<br>(0.045)  | 519              | 1.782<br>(0.045)  | 535              | 1.753<br>(0.044)  | 533                | 1.769<br>(0.045)  | 0.977                                             |
| Trust LC1 Govt      | 546               | 2.266<br>(0.042)  | 510              | 2.257<br>(0.044)  | 528              | 2.278<br>(0.041)  | 530                | 2.270<br>(0.043)  | 0.988                                             |
| Trust Community     | 570               | 1.709<br>(0.037)  | 539              | 1.714<br>(0.040)  | 557              | 1.740<br>(0.038)  | 550                | 1.620<br>(0.039)  | 0.142                                             |

Table D.3: Correlations in Measures of Trust

| <b>Top Panel: Baseline Measures of Trust</b>     |         |        |          |       |        |           |        |
|--------------------------------------------------|---------|--------|----------|-------|--------|-----------|--------|
|                                                  | Central | Police | District | LC3   | LC1    | Community | NRM ID |
| Central Gov                                      | 1       |        |          |       |        |           |        |
| Police                                           | 0.316   | 1      |          |       |        |           |        |
| District Gov                                     | 0.354   | 0.257  | 1        |       |        |           |        |
| LC3 Gov                                          | 0.291   | 0.230  | 0.445    | 1     |        |           |        |
| LC1 Gov                                          | 0.210   | 0.255  | 0.214    | 0.253 | 1      |           |        |
| Community                                        | 0.252   | 0.224  | 0.246    | 0.270 | 0.290  | 1         |        |
| NRM ID                                           | 0.154   | 0.0920 | 0.0593   | 0.107 | 0.0467 | 0.0754    | 1      |
| <b>Bottom Panel: Follow-up Measures of Trust</b> |         |        |          |       |        |           |        |
|                                                  | Central | Police | District | MoH   | LC1    | Community | NRM ID |
| Central Gov                                      | 1       |        |          |       |        |           |        |
| Police                                           | 0.453   | 1      |          |       |        |           |        |
| District Gov                                     | 0.415   | 0.344  | 1        |       |        |           |        |
| MoH                                              | 0.374   | 0.397  | 0.243    | 1     |        |           |        |
| LC1                                              | 0.249   | 0.282  | 0.278    | 0.192 | 1      |           |        |
| Community                                        | 0.187   | 0.228  | 0.266    | 0.172 | 0.402  | 1         |        |
| NRM ID                                           | 0.223   | 0.196  | 0.103    | 0.135 | 0.0199 | 0.0296    | 1      |

Table D.4: Correlates of Public Health Compliance (with Partisanship)

| <b>Top Panel: Baseline Measures of Trust</b>     |          |                   |                   |          |
|--------------------------------------------------|----------|-------------------|-------------------|----------|
|                                                  | (1)      | (2)               | (3)               | (4)      |
| Trust in Government (Index)                      | 0.06*    |                   |                   | 0.06*    |
|                                                  | (0.03)   |                   |                   | (0.03)   |
| Trust LC1 Govt                                   |          | 0.03              |                   | 0.01     |
|                                                  |          | (0.02)            |                   | (0.03)   |
| Trust People in Community                        |          |                   | 0.04              | 0.02     |
|                                                  |          |                   | (0.03)            | (0.03)   |
| NRM Party ID                                     | 0.10     | 0.11 <sup>+</sup> | 0.11 <sup>+</sup> | 0.10     |
|                                                  | (0.06)   | (0.06)            | (0.06)            | (0.06)   |
| Constant                                         | -0.76*** | -0.68***          | -0.73***          | -0.72*** |
|                                                  | (0.08)   | (0.10)            | (0.08)            | (0.10)   |
| Demographic Controls                             | YES      | YES               | YES               | YES      |
| Village FE                                       | YES      | YES               | YES               | YES      |
| Observations                                     | 1905     | 1905              | 1905              | 1905     |
| <b>Bottom Panel: Follow-up Measures of Trust</b> |          |                   |                   |          |
|                                                  | (5)      | (6)               | (7)               | (8)      |
| Trust in Government (Index)                      | 0.09**   |                   |                   | 0.08**   |
|                                                  | (0.03)   |                   |                   | (0.03)   |
| Trust LC1                                        |          | 0.04              |                   | 0.01     |
|                                                  |          | (0.03)            |                   | (0.03)   |
| Trust People in Community                        |          |                   | 0.05 <sup>+</sup> | 0.03     |
|                                                  |          |                   | (0.03)            | (0.03)   |
| NRM Party ID                                     | 0.07     | 0.11 <sup>+</sup> | 0.11 <sup>+</sup> | 0.07     |
|                                                  | (0.06)   | (0.06)            | (0.06)            | (0.06)   |
| Constant                                         | -0.79*** | -0.79***          | -0.82***          | -0.82*** |
|                                                  | (0.08)   | (0.08)            | (0.08)            | (0.08)   |
| Demographic Controls                             | YES      | YES               | YES               | YES      |
| Village FE                                       | YES      | YES               | YES               | YES      |
| Observations                                     | 1905     | 1905              | 1905              | 1905     |

Notes: OLS regression models with standard errors clustered at the village level.

Each model includes covariates for gender, age, education, and income levels at baseline.

DV: Index of public health compliance.

Standard errors in parentheses

<sup>+</sup>  $p < 0.10$ , \*  $p < 0.05$ , \*\*  $p < 0.01$ , \*\*\*  $p < 0.001$

Table D.5: Disaggregating Trust in the State (With NRM ID)

| <b>Top Panel: Baseline Measures of Trust</b>     |                    |                    |                    |                    |                    |
|--------------------------------------------------|--------------------|--------------------|--------------------|--------------------|--------------------|
|                                                  | (1)                | (2)                | (3)                | (4)                | (5)                |
| Trust Central Govt                               | 0.04<br>(0.03)     |                    |                    |                    | 0.02<br>(0.03)     |
| Trust Police                                     |                    | 0.06*<br>(0.03)    |                    |                    | 0.05+<br>(0.03)    |
| Trust District Govt                              |                    |                    | 0.03<br>(0.02)     |                    | 0.01<br>(0.03)     |
| Trust in LC3 Govt                                |                    |                    |                    | 0.04<br>(0.03)     | 0.02<br>(0.03)     |
| NRM Party ID                                     | 0.10+<br>(0.06)    | 0.10+<br>(0.06)    | 0.11+<br>(0.06)    | 0.11+<br>(0.06)    | 0.10<br>(0.06)     |
| Constant                                         | -0.74***<br>(0.08) | -0.76***<br>(0.08) | -0.77***<br>(0.08) | -0.76***<br>(0.08) | -0.75***<br>(0.08) |
| Demographic Controls                             | YES                | YES                | YES                | YES                | YES                |
| Village FE                                       | YES                | YES                | YES                | YES                | YES                |
| Observations                                     | 1905               | 1905               | 1905               | 1905               | 1905               |
| <b>Bottom Panel: Follow-up Measures of Trust</b> |                    |                    |                    |                    |                    |
|                                                  | (6)                | (7)                | (8)                | (9)                | (10)               |
| Trust Central Govt                               | 0.06*<br>(0.03)    |                    |                    |                    | 0.02<br>(0.03)     |
| Trust Police                                     |                    | 0.08**<br>(0.03)   |                    |                    | 0.05<br>(0.03)     |
| Trust District Govt                              |                    |                    | 0.05+<br>(0.03)    |                    | 0.02<br>(0.03)     |
| Trust MoH                                        |                    |                    |                    | 0.07**<br>(0.03)   | 0.05+<br>(0.03)    |
| NRM Party ID                                     | 0.09<br>(0.06)     | 0.08<br>(0.06)     | 0.11+<br>(0.06)    | 0.09<br>(0.06)     | 0.07<br>(0.06)     |
| Constant                                         | -0.77***<br>(0.08) | -0.70***<br>(0.08) | -0.82***<br>(0.08) | -0.76***<br>(0.08) | -0.76***<br>(0.09) |
| Demographic Controls                             | YES                | YES                | YES                | YES                | YES                |
| Village FE                                       | YES                | YES                | YES                | YES                | YES                |
| Observations                                     | 1905               | 1905               | 1905               | 1905               | 1905               |

Notes: OLS regression models with standard errors clustered at the village level.

Each model includes covariates for gender, age, education, and income levels at baseline.

DV: Index of public health compliance.

Standard errors in parentheses

+  $p < 0.10$ , \*  $p < 0.05$ , \*\*  $p < 0.01$ , \*\*\*  $p < 0.001$

Table D.6: Correlates of Public Health Compliance (No Controls)

| <b>Top Panel: Baseline Measures of Trust</b>     |                    |                    |                    |                    |
|--------------------------------------------------|--------------------|--------------------|--------------------|--------------------|
|                                                  | (1)                | (2)                | (3)                | (4)                |
| Trust in Government (Index)                      | 0.09***<br>(0.03)  |                    |                    | 0.08**<br>(0.03)   |
| Trust LC1 Govt                                   |                    | 0.04+<br>(0.02)    |                    | 0.02<br>(0.03)     |
| Trust People in Community                        |                    |                    | 0.03<br>(0.03)     | -0.00<br>(0.03)    |
| Constant                                         | -0.40***<br>(0.01) | -0.26***<br>(0.06) | -0.33***<br>(0.02) | -0.36***<br>(0.06) |
| Village FE                                       | YES                | YES                | YES                | YES                |
| Observations                                     | 1905               | 1905               | 1905               | 1905               |
| <b>Bottom Panel: Follow-up Measures of Trust</b> |                    |                    |                    |                    |
|                                                  | (5)                | (6)                | (7)                | (8)                |
| Trust in Government (Index)                      | 0.13***<br>(0.03)  |                    |                    | 0.12***<br>(0.03)  |
| Trust LC1                                        |                    | 0.04+<br>(0.03)    |                    | -0.00<br>(0.03)    |
| Trust People in Community                        |                    |                    | 0.05+<br>(0.03)    | 0.01<br>(0.03)     |
| Constant                                         | -0.49***<br>(0.03) | -0.39***<br>(0.02) | -0.41***<br>(0.03) | -0.50***<br>(0.04) |
| Village FE                                       | YES                | YES                | YES                | YES                |
| Observations                                     | 1905               | 1905               | 1905               | 1905               |

Notes: OLS regression models with S.E. clustered at the village level.

Standard errors in parentheses

+  $p < 0.10$ , \*  $p < 0.05$ , \*\*  $p < 0.01$ , \*\*\*  $p < 0.001$

Table D.7: Disaggregating Trust in the State (No Controls)

| <b>Top Panel: Baseline Measures of Trust</b>     |          |          |                   |          |                   |
|--------------------------------------------------|----------|----------|-------------------|----------|-------------------|
|                                                  | (1)      | (2)      | (3)               | (4)      | (5)               |
| Trust Central Govt                               | 0.06*    |          |                   |          | 0.03              |
|                                                  | (0.03)   |          |                   |          | (0.03)            |
| Trust Police                                     |          | 0.09***  |                   |          | 0.08**            |
|                                                  |          | (0.03)   |                   |          | (0.03)            |
| Trust District Govt                              |          |          | 0.04 <sup>+</sup> |          | 0.01              |
|                                                  |          |          | (0.03)            |          | (0.03)            |
| Trust in LC3 Govt                                |          |          |                   | 0.04     | 0.01              |
|                                                  |          |          |                   | (0.03)   | (0.03)            |
| Constant                                         | -0.36*** | -0.40*** | -0.37***          | -0.36*** | -0.41***          |
|                                                  | (0.00)   | (0.01)   | (0.01)            | (0.01)   | (0.02)            |
| Village FE                                       | YES      | YES      | YES               | YES      | YES               |
| Observations                                     | 1905     | 1905     | 1905              | 1905     | 1905              |
| <b>Bottom Panel: Follow-up Measures of Trust</b> |          |          |                   |          |                   |
|                                                  | (6)      | (7)      | (8)               | (9)      | (10)              |
| Trust Central Govt                               | 0.08**   |          |                   |          | 0.02              |
|                                                  | (0.03)   |          |                   |          | (0.03)            |
| Trust Police                                     |          | 0.11***  |                   |          | 0.08*             |
|                                                  |          | (0.03)   |                   |          | (0.03)            |
| Trust District Govt                              |          |          | 0.06*             |          | 0.01              |
|                                                  |          |          | (0.03)            |          | (0.03)            |
| Trust MoH                                        |          |          |                   | 0.10***  | 0.05 <sup>+</sup> |
|                                                  |          |          |                   | (0.03)   | (0.03)            |
| Constant                                         | -0.43*** | -0.37*** | -0.45***          | -0.41*** | -0.44***          |
|                                                  | (0.03)   | (0.00)   | (0.04)            | (0.02)   | (0.05)            |
| Village FE                                       | YES      | YES      | YES               | YES      | YES               |
| Observations                                     | 1905     | 1905     | 1905              | 1905     | 1905              |

Notes: OLS regression models with standard errors clustered at the village level.

DV: Index of public health compliance.

Standard errors in parentheses

<sup>+</sup>  $p < 0.10$ , \*  $p < 0.05$ , \*\*  $p < 0.01$ , \*\*\*  $p < 0.001$

Table D.8: Correlates of Public Health Compliance - District Clustered S.E.

| <b>Top Panel: Baseline Measures of Trust</b>     |          |                   |                   |                   |
|--------------------------------------------------|----------|-------------------|-------------------|-------------------|
|                                                  | (1)      | (2)               | (3)               | (4)               |
| Trust in Government (Index)                      | 0.07*    |                   |                   | 0.06 <sup>+</sup> |
|                                                  | (0.02)   |                   |                   | (0.03)            |
| Trust LC1 Govt                                   |          | 0.03 <sup>+</sup> |                   | 0.01              |
|                                                  |          | (0.02)            |                   | (0.02)            |
| Trust People in Community                        |          |                   | 0.04              | 0.02              |
|                                                  |          |                   | (0.02)            | (0.03)            |
| Constant                                         | -0.66*** | -0.57***          | -0.62***          | -0.63***          |
|                                                  | (0.03)   | (0.04)            | (0.02)            | (0.04)            |
| Demographic Controls                             | YES      | YES               | YES               | YES               |
| Village FE                                       | YES      | YES               | YES               | YES               |
| Observations                                     | 1905     | 1905              | 1905              | 1905              |
| <b>Bottom Panel: Follow-up Measures of Trust</b> |          |                   |                   |                   |
|                                                  | (5)      | (6)               | (7)               | (8)               |
| Trust in Government (Index)                      | 0.10**   |                   |                   | 0.09*             |
|                                                  | (0.03)   |                   |                   | (0.03)            |
| Trust LC1                                        |          | 0.05*             |                   | 0.01              |
|                                                  |          | (0.02)            |                   | (0.02)            |
| Trust People in Community                        |          |                   | 0.05 <sup>+</sup> | 0.03              |
|                                                  |          |                   | (0.03)            | (0.03)            |
| Constant                                         | -0.72*** | -0.69***          | -0.72***          | -0.76***          |
|                                                  | (0.03)   | (0.03)            | (0.03)            | (0.04)            |
| Demographic Controls                             | YES      | YES               | YES               | YES               |
| Village FE                                       | YES      | YES               | YES               | YES               |
| Observations                                     | 1905     | 1905              | 1905              | 1905              |

Notes: OLS regression models with standard errors clustered at the DISTRICT level.

Each model includes covariates for gender, age, education, and income levels at baseline.

DV: Index of public health compliance.

Standard errors in parentheses

<sup>+</sup>  $p < 0.10$ , \*  $p < 0.05$ , \*\*  $p < 0.01$ , \*\*\*  $p < 0.001$



Table D.9: Disaggregating Trust in the State - District Clustered S.E.

| <b>Top Panel: Baseline Measures of Trust</b>     |                    |                    |                    |                    |                    |
|--------------------------------------------------|--------------------|--------------------|--------------------|--------------------|--------------------|
|                                                  | (1)                | (2)                | (3)                | (4)                | (5)                |
| Trust Central Govt                               | 0.05<br>(0.03)     |                    |                    |                    | 0.03<br>(0.03)     |
| Trust Police                                     |                    | 0.06*<br>(0.02)    |                    |                    | 0.05+<br>(0.03)    |
| Trust District Govt                              |                    |                    | 0.03<br>(0.03)     |                    | 0.00<br>(0.04)     |
| Trust in LC3 Govt                                |                    |                    |                    | 0.04+<br>(0.02)    | 0.02<br>(0.03)     |
| Constant                                         | -0.65***<br>(0.03) | -0.65***<br>(0.03) | -0.66***<br>(0.04) | -0.66***<br>(0.03) | -0.66***<br>(0.04) |
| Demographic Controls                             | YES                | YES                | YES                | YES                | YES                |
| Village FE                                       | YES                | YES                | YES                | YES                | YES                |
| Observations                                     | 1905               | 1905               | 1905               | 1905               | 1905               |
| <b>Bottom Panel: Follow-up Measures of Trust</b> |                    |                    |                    |                    |                    |
|                                                  | (6)                | (7)                | (8)                | (9)                | (10)               |
| Trust Central Govt                               | 0.07*<br>(0.03)    |                    |                    |                    | 0.02<br>(0.03)     |
| Trust Police                                     |                    | 0.08**<br>(0.02)   |                    |                    | 0.05+<br>(0.02)    |
| Trust District Govt                              |                    |                    | 0.05<br>(0.03)     |                    | 0.02<br>(0.03)     |
| Trust MoH                                        |                    |                    |                    | 0.08**<br>(0.03)   | 0.05*<br>(0.02)    |
| Constant                                         | -0.69***<br>(0.02) | -0.62***<br>(0.04) | -0.72***<br>(0.05) | -0.68***<br>(0.03) | -0.69***<br>(0.06) |
| Demographic Controls                             | YES                | YES                | YES                | YES                | YES                |
| Village FE                                       | YES                | YES                | YES                | YES                | YES                |
| Observations                                     | YES                | YES                | YES                | YES                | YES                |

Notes: OLS regression models with standard errors clustered at the DISTRICT level.

Each model includes covariates for gender, age, education, and income levels at baseline.

DV: Index of public health compliance.

Standard errors in parentheses

+  $p < 0.10$ , \*  $p < 0.05$ , \*\*  $p < 0.01$ , \*\*\*  $p < 0.001$

Table D.10: Correlates of COVID Knowledge (True/False Questions)

| <b>Top Panel: Baseline Measures of Trust</b>     |                    |                    |                    |                              |
|--------------------------------------------------|--------------------|--------------------|--------------------|------------------------------|
|                                                  | (1)                | (2)                | (3)                | (4)                          |
| Trust in Government (Index)                      | -0.02<br>(0.02)    |                    |                    | -0.01<br>(0.02)              |
| Trust LC1 Govt                                   |                    | -0.03<br>(0.02)    |                    | -0.03<br>(0.02)              |
| Trust People in Community                        |                    |                    | -0.01<br>(0.02)    | -0.00<br>(0.02)              |
| Female                                           | -0.13***<br>(0.04) | -0.13***<br>(0.04) | -0.14***<br>(0.04) | -0.13***<br>(0.04)           |
| Age                                              | 0.03<br>(0.02)     | 0.03<br>(0.02)     | 0.03<br>(0.02)     | 0.03<br>(0.02)               |
| Education                                        | 0.11***<br>(0.02)  | 0.11***<br>(0.02)  | 0.11***<br>(0.02)  | 0.11***<br>(0.02)            |
| Income                                           | 0.00<br>(0.02)     | -0.00<br>(0.02)    | -0.00<br>(0.02)    | -0.00<br>(0.02)              |
| Constant                                         | 1.18***<br>(0.04)  | 1.11***<br>(0.06)  | 1.17***<br>(0.04)  | 1.11***<br>(0.06)            |
| Village FE                                       | YES                | YES                | YES                | YES                          |
| Observations                                     | 1905               | 1905               | 1905               | 1905                         |
| <b>Bottom Panel: Follow-up Measures of Trust</b> |                    |                    |                    |                              |
| Trust in Government (Index)                      | -0.05*<br>(0.02)   |                    |                    | -0.04<br>(0.02)              |
| Trust LC1                                        |                    | -0.04*<br>(0.02)   |                    | -0.03 <sup>+</sup><br>(0.02) |
| Trust People in Community                        |                    |                    | -0.02<br>(0.02)    | 0.00<br>(0.02)               |
| Female                                           | -0.12**<br>(0.04)  | -0.14***<br>(0.04) | -0.14***<br>(0.04) | -0.13***<br>(0.04)           |
| Age                                              | 0.03<br>(0.02)     | 0.03<br>(0.02)     | 0.03<br>(0.02)     | 0.03<br>(0.02)               |
| Education                                        | 0.10***<br>(0.02)  | 0.10***<br>(0.02)  | 0.11***<br>(0.02)  | 0.10***<br>(0.02)            |
| Income                                           | -0.00<br>(0.02)    | 0.00<br>(0.02)     | -0.00<br>(0.02)    | -0.00<br>(0.02)              |
| Constant                                         | 1.21***<br>(0.04)  | 1.22***<br>(0.04)  | 1.20***<br>(0.05)  | 1.23***<br>(0.05)            |
| Village FE                                       | YES                | YES                | YES                | YES                          |
| Observations                                     | 1905               | 1905               | 1905               | 1905                         |

Notes: OLS regression models with standard errors clustered at the village level.

DV: Count of correct responses to COVID T/F Questions

Standard errors in parentheses

<sup>+</sup>  $p < 0.10$ , \*  $p < 0.05$ , \*\*  $p < 0.01$ , \*\*\*  $p < 0.001$

Table D.11: Correlates of Knowledge of COVID Symptoms

| <b>Top Panel: Baseline Measures of Trust</b>     |                   |                   |                   |                             |
|--------------------------------------------------|-------------------|-------------------|-------------------|-----------------------------|
|                                                  | (1)               | (2)               | (3)               | (4)                         |
| Trust in Government (Index)                      | -0.01<br>(0.01)   |                   |                   | -0.01<br>(0.01)             |
| Trust LC1 Govt                                   |                   | -0.00<br>(0.01)   |                   | -0.01<br>(0.01)             |
| Trust People in Community                        |                   |                   | 0.02<br>(0.01)    | 0.02 <sup>+</sup><br>(0.01) |
| Female                                           | 0.02<br>(0.02)    | 0.02<br>(0.02)    | 0.02<br>(0.02)    | 0.02<br>(0.02)              |
| Age                                              | -0.02<br>(0.01)   | -0.02<br>(0.01)   | -0.02<br>(0.01)   | -0.02<br>(0.01)             |
| Education                                        | 0.01<br>(0.01)    | 0.01<br>(0.01)    | 0.01<br>(0.01)    | 0.01<br>(0.01)              |
| Income                                           | 0.00<br>(0.01)    | 0.00<br>(0.01)    | 0.00<br>(0.01)    | 0.00<br>(0.01)              |
| Constant                                         | 1.99***<br>(0.02) | 1.98***<br>(0.03) | 2.00***<br>(0.02) | 2.00***<br>(0.03)           |
| Village FE                                       | YES               | YES               | YES               | YES                         |
| Observations                                     | 1905              | 1905              | 1905              | 1905                        |
| <b>Bottom Panel: Follow-up Measures of Trust</b> |                   |                   |                   |                             |
|                                                  | (5)               | (6)               | (7)               | (8)                         |
| Trust in Government (Index)                      | -0.01<br>(0.01)   |                   |                   | -0.01<br>(0.01)             |
| Trust LC1                                        |                   | -0.01<br>(0.01)   |                   | -0.01<br>(0.01)             |
| Trust People in Community                        |                   |                   | -0.00<br>(0.01)   | 0.00<br>(0.01)              |
| Female                                           | 0.02<br>(0.02)    | 0.02<br>(0.02)    | 0.02<br>(0.02)    | 0.02<br>(0.02)              |
| Age                                              | -0.02<br>(0.01)   | -0.02<br>(0.01)   | -0.02<br>(0.01)   | -0.02<br>(0.01)             |
| Education                                        | 0.01<br>(0.01)    | 0.01<br>(0.01)    | 0.01<br>(0.01)    | 0.01<br>(0.01)              |
| Income                                           | 0.00<br>(0.01)    | 0.00<br>(0.01)    | 0.00<br>(0.01)    | 0.00<br>(0.01)              |
| Constant                                         | 2.00***<br>(0.02) | 2.00***<br>(0.02) | 2.00***<br>(0.02) | 2.00***<br>(0.03)           |
| Village FE                                       | YES               | YES               | YES               | YES                         |
| Observations                                     | 1905              | 1905              | 1905              | 1905                        |

Notes: OLS regression models with S.E. clustered at the village level (in parentheses).

DV: Knowledge of COVID symptoms (count)

<sup>+</sup>  $p < 0.10$ , \*  $p < 0.05$ , \*\*  $p < 0.01$ , \*\*\*  $p < 0.001$

Table D.12: List Experiment on Not Wearing Masks

| (1)          |                   |
|--------------|-------------------|
| Delta        |                   |
| Constant     | 0.51***<br>(0.04) |
| Gamma        |                   |
| Constant     | 1.51***<br>(0.02) |
| Observations | 2586              |

Notes: Least squares linear estimator with standard errors clustered at the village level.

Delta = estimated proportion of sample not wearing mask in public.

Gamma = predicted number of affirmative answers to non-sensitive items.

+  $p < 0.10$ , \*  $p < 0.05$ , \*\*  $p < 0.01$ , \*\*\*  $p < 0.001$

Table D.13: List Experiment on Attending Religious Service

| (1)          |                   |
|--------------|-------------------|
| Delta        |                   |
| Constant     | 0.05<br>(0.03)    |
| Gamma        |                   |
| Constant     | 1.49***<br>(0.02) |
| Observations | 2587              |

Notes: Least squares linear estimator with standard errors clustered at the village level.

Delta = estimated proportion of sample attending church or mosque in last 7 days.

Gamma = predicted number of affirmative answers to non-sensitive items.

+  $p < 0.10$ , \*  $p < 0.05$ , \*\*  $p < 0.01$ , \*\*\*  $p < 0.001$
